# Supplementary material for: Towards a Point-of-Care (POC) Diagnostic Platform for the Multiplex Electrochemiluminescent (ECL) Sensing of Mild Traumatic Brain Injury (mTBI) Biomarkers
Source: MDPI journal article supplement (doi:10.3390/bios12030172), 2022-03-11
Supplement: s1 [file s1]

## Supplementary Information

# Towards a Point-of-Care (POC) Diagnostic Platform for the Multiplex Electrochemiluminescent (ECL) Sensing of Mild Traumatic Brain Injury (mTBI) Biomarkers

M. Jović, D. Prim, E. Saini, M. E. Pfeifer\*

<sup>1</sup> University of Applied Sciences and Arts Western Switzerland (HES-SO Valais-Wallis),  
Institute of Life Technologies, Diagnostic Systems Research Group, rue de l'Industrie 23,  
1950 Sion, Switzerland; info.itv@hevs.ch

\* Correspondence: marc.pfeifer@hevs.ch; Tel.: +41 58 606 86 61

|                                                                                                                                     |    |
|-------------------------------------------------------------------------------------------------------------------------------------|----|
| <b>Table S1:</b> Summary of GFAP, h-FABP and S100 $\beta$ sensors developed in the last 10 years and their analytical performances. | 2  |
| <b>Figure S1:</b> Four-parameter (4PL) dose-response nonlinear regression model for MSD calibration curves.                         | 12 |
| GFAP                                                                                                                                | 12 |
| h-FABP                                                                                                                              | 13 |
| S100 $\beta$                                                                                                                        | 14 |
| <b>Figure S2:</b> Electrochemical characterization of commercially available screen-printed electrodes (SPE) for ECL applications.  | 15 |
| <b>Figure S3:</b> SEM images of commercially available Screen-Printed Carbon Electrodes (SPCEs) for ECL applications.               | 17 |
| <b>Figure S4:</b> Linear regression model for SPCE $\mu$ STAT-ECL calibration curves.                                               | 18 |
| GFAP                                                                                                                                | 18 |
| h-FABP                                                                                                                              | 19 |
| S100 $\beta$                                                                                                                        | 20 |
| <b>Figure S5:</b> Results of the recovery studies.                                                                                  | 21 |
| <b>Figure S6:</b> CAD drawing of incubation cells used for SPEs.                                                                    | 22 |
| <b>References</b>                                                                                                                   | 23 |

**Table S1:** Summary of GFAP, h-FABP and S100 $\beta$  detection strategies reported in the literature and commercialized products and assay kits.

| Biomarker                                                          | Brief description of method/<br>Detection approach                            | Sensor/Assay architecture                                                                           | Publication year and reference | Lower Detection Limit (1)                                                    | Range (2)                                      | Tentative suitability for POC applications ( <i>advantages/disadvantages</i> ) (3)                    |
|--------------------------------------------------------------------|-------------------------------------------------------------------------------|-----------------------------------------------------------------------------------------------------|--------------------------------|------------------------------------------------------------------------------|------------------------------------------------|-------------------------------------------------------------------------------------------------------|
| <i>- Academic publications -</i>                                   |                                                                               |                                                                                                     |                                |                                                                              |                                                |                                                                                                       |
| <b>GFAP</b><br><i>Glial fibrillary acidic protein</i><br><br>(1/3) | Label-free biosensor<br>Electrochemical impedance spectroscopy (EIS) read-out | Au MDEA or<br>Au MECS/TSP/Ab/T                                                                      | 2013 [1]                       | 1 pg mL <sup>-1</sup> (buffer)                                               | 1 pg mL <sup>-1</sup> –100 ng mL <sup>-1</sup> | ✓ Label free<br>✓ Sample volume (60 $\mu$ L)<br>X Complex fabrication                                 |
|                                                                    | Organic thin film transistor (TFT) protein sensor<br>FED (OFET)               | Si/SiO <sub>2</sub> /(w/wo Pentacene or 8-3 NTCDI)/CYTOP/C44H90/<br>NHS-PS-block PAA (EDC+NHS)/Ab/T | 2014 [2]                       | 1 ng mL <sup>-1</sup> (buffer)                                               | 0.8-400 ng mL <sup>-1</sup>                    | ✓ Label free<br>X Sensitivity<br>X Complex fabrication                                                |
|                                                                    | Molecularly Imprinted Polymer (MIP) sensor<br>Electrochemical read-out (DPV)  | MIP-MWCNTs: (MWCNTs+AIBN+DMAA+AEDP+EGDMA[T])/agarose film/(SDS+HCl)/EDTA                            | 2017 [3]                       | 0.04 $\mu$ g mL <sup>-1</sup> (buffer)<br><0.9 $\mu$ g mL <sup>-1</sup> (HS) | 0.2-10 $\mu$ g mL <sup>-1</sup>                | ✓ Label free<br>✓ Sample volume (50 $\mu$ L)<br>X Sensitivity<br>X Complex fabrication                |
|                                                                    | Organic field effect transistor biosensor (OFET)                              | Drive: Si/SiO <sub>2</sub> /Pentacene/Au<br>Sensing: Si/(PS-MA+PEG)/Ab/T                            | 2017 [4]                       | 1 ng mL <sup>-1</sup> (buffer)                                               | 0.5-100 ng mL <sup>-1</sup>                    | ✓ Label free<br>X Sensitivity                                                                         |
|                                                                    | Label-free biosensor<br>Electrochemical impedance spectroscopy (EIS) read-out | Graphene SPE/NaOH (-OH)/PEI/GA/Ab/T                                                                 | 2018 [5]                       | 1 pg mL <sup>-1</sup> (buffer)<br>1 pg mL <sup>-1</sup> (HS)                 | 1 pg mL <sup>-1</sup> –100 ng mL <sup>-1</sup> | ✓ Label free<br>✓ Sensitivity<br>✓ Sample volume (50 $\mu$ L)<br>✓ Detection in serum and CSF samples |
|                                                                    | Immunosorbent assay with Carbon Dots (CD)<br>Fluorescence read-out            | Protein A/G/Ab <sub>1</sub> /T/Ab <sub>2</sub> /CDs                                                 | 2018 [6]                       | 25 pg mL <sup>-1</sup>                                                       | 0.1–8 ng mL <sup>-1</sup>                      | ✓ Sensitivity<br>✓ Detection in serum samples<br>✓ Potential for Multiplexing                         |

| Biomarker                                                          | Brief description of method/<br>Detection approach                                                                                        | Sensor/Assay architecture                                                       | Publication year and reference | Lower Detection Limit (1)                                                 | Range (2)                                        | Tentative suitability for POC applications ( <i>advantages/disadvantages</i> ) (3)                   |
|--------------------------------------------------------------------|-------------------------------------------------------------------------------------------------------------------------------------------|---------------------------------------------------------------------------------|--------------------------------|---------------------------------------------------------------------------|--------------------------------------------------|------------------------------------------------------------------------------------------------------|
| <b>GFAP</b><br><i>Glial fibrillary acidic protein</i><br><br>(2/3) | Label-free biosensor<br>Single frequency impedance electrochemical spectroscopy (EIS SFI) read-out                                        | Au DE/MHDA/(EDC+NHS)/Ab/T                                                       | 2019 [7]                       | 2-5 pg mL <sup>-1</sup><br>14-67 pg mL <sup>-1</sup> (90% whole blood)    | 0.1-2800 pg mL <sup>-1</sup>                     | ✓ Label free<br>✓ Sensitivity<br>✓ Multiplexing (4 biomarkers)<br>✓ Detection in blood samples       |
|                                                                    | QCM sensors<br>Ultra-high frequency surface acoustic wave (SAW) read-out                                                                  | F1: Au/PEG/streptavidin/biotin-Ab/T<br>F2: Au/Protein G/Ab/T<br>F3: Au/S-S/Ab/T | 2021 [8]                       | 35 pM<br>(buffer and serum)                                               | n/a                                              | ✓ Lab-on-a-chip<br>✓ Detection in serum samples                                                      |
|                                                                    | Sandwich Immunoassay<br>Electrochemiluminescence read-out (ECL) on MesoScale Discovery platform                                           | SPCE/Ab <sub>1</sub> /T/Ab <sub>2</sub> -Ru label                               | 2021 [9]                       | 9 pg mL <sup>-1</sup><br>(buffer and plasma)                              | 200 pg mL <sup>-1</sup> -200 ng mL <sup>-1</sup> | ✓ Sensitivity<br>X Currently developed for benchtop instrument                                       |
|                                                                    | Magnetic bead (MB)-based quantum dot-linked immunosorbent assays (QLISAs) in variable height microfluidic device<br>Fluorescence read-out | MB-Ab <sub>1</sub> /T/Ab <sub>2</sub> -QD                                       | 2021 [10]                      | 125 pg mL <sup>-1</sup> (serum)<br>1112 pg mL <sup>-1</sup> (whole blood) | 0.1-10 ng mL <sup>-1</sup>                       | X Sensitivity<br>✓ Detection in serum/blood samples<br>✓ Multiplexing (3 biomarkers)<br>✓ POC format |
|                                                                    | Lateral flow immunoassay (LFIA)<br>Time-resolved fluorescence (TRF) read-out                                                              | Ab <sub>1</sub> /T/Ab <sub>2</sub> -CM EUs                                      | 2022 [11]                      | 10 pg mL <sup>-1</sup><br>(whole blood)                                   | 0-400 pg mL <sup>-1</sup>                        | ✓ Sensitivity<br>✓ POC format<br>✓ Detection in blood samples<br>✓ 25 min analysis time              |
|                                                                    | <i>- Commercial products (RUO/diagnostic instruments, devices, or kits) -</i>                                                             |                                                                                 |                                |                                                                           |                                                  |                                                                                                      |
|                                                                    | ELISA kit (Sigma Aldrich)<br>Colorimetric read-out<br><i>Research use only</i>                                                            | Microtiter plate/Ab <sub>1</sub> /T/Ab <sub>2</sub> -biotin/streptavidin HRP    | GFAP ELISA Kit, NS830-M [12]   | n/a                                                                       | 1.5-100 ng mL <sup>-1</sup>                      | Intended for benchtop platforms                                                                      |

| Biomarker                                                          | Brief description of method/<br>Detection approach                                                                                                                | Sensor/Assay architecture                                                      | Publication year and reference                   | Lower Detection Limit (1)                               | Range (2)                     | Tentative suitability for POC applications ( <i>advantages/disadvantages</i> ) (3) |
|--------------------------------------------------------------------|-------------------------------------------------------------------------------------------------------------------------------------------------------------------|--------------------------------------------------------------------------------|--------------------------------------------------|---------------------------------------------------------|-------------------------------|------------------------------------------------------------------------------------|
| <b>GFAP</b><br><i>Glial fibrillary acidic protein</i><br><br>(3/3) | Sandwich immunoassay kit<br>Electrochemiluminescence (ECL) read-out<br>(MesoScale Discovery)<br><i>Research use only</i>                                          | Microtiter plate with SPCE/Ab <sub>1</sub> /T/Ab <sub>2</sub> -SULFO TAG label | R-PLEX Human GFAP Antibody Set (F211M-3/-8) [13] | 63 pg mL <sup>-1</sup>                                  | ≤ 500 ng mL <sup>-1</sup>     | Intended for MesoScale Discovery instruments                                       |
|                                                                    | ELISA kit with chemiluminescence (CL) read-out<br>Banyan BTI™<br><i>In vitro diagnostic kit</i>                                                                   | Microtiter plate/Ab <sub>1</sub> /T/Ab <sub>2</sub> /substrate                 | Banyan BTI™ [14,15]                              | 10 pg mL <sup>-1</sup> (human serum)                    | 10-320 pg mL <sup>-1</sup>    | Intended for benchtop platforms                                                    |
|                                                                    | ELISA kit (Quanterix Simoa®)<br>Fluorescence read-out<br><i>In vitro diagnostic kit</i><br>(*License from Banyan Biomarkers)                                      | MB-Ab <sub>1</sub> /T/Ab <sub>2</sub> -label                                   | GFAP Discovery kit* [16]                         | 0.467 pg mL <sup>-1</sup> (human CSF, serum and plasma) | 0-4'000 pg mL <sup>-1</sup>   | Intended for Quanterix Simoa instruments (SR-X, HD-1, HD-X)                        |
|                                                                    | Hand-held device<br>i-STAT Alinity<br>Abbott Point of Care Inc<br>Amperometric read-out<br><i>In vitro diagnostic device</i><br>(*License from Banyan Biomarkers) | Au electrode/(MB-)Ab <sub>1</sub> /T/Ab <sub>2</sub> -ALP                      | Duplex (GFAP & UCH-L1)* cartridge [17–20]        | 23 pg mL <sup>-1</sup> (human plasma)                   | 30-10'000 pg mL <sup>-1</sup> | Intended for POC                                                                   |
|                                                                    | Metal-oxide semi-conductive (CMOS) compatible nanosensors (NanoDx)                                                                                                | Nanowires/Ab/T                                                                 | TBI Duplex (GFAP & S100 β) [21]                  | n/a                                                     | n/a                           | Intended for POC<br><i>Prototype under development</i>                             |

| Biomarker | Brief description of method/<br>Detection approach | Sensor/Assay architecture | Publication year and reference | Lower Detection Limit (1) | Range (2) | Tentative suitability for POC applications ( <i>advantages/disadvantages</i> ) (3) |
|-----------|----------------------------------------------------|---------------------------|--------------------------------|---------------------------|-----------|------------------------------------------------------------------------------------|
|-----------|----------------------------------------------------|---------------------------|--------------------------------|---------------------------|-----------|------------------------------------------------------------------------------------|

- Academic publications -

|                                                                   |                                                                                    |                                                                                        |           |                                                                               |                                                   |                                                                                            |
|-------------------------------------------------------------------|------------------------------------------------------------------------------------|----------------------------------------------------------------------------------------|-----------|-------------------------------------------------------------------------------|---------------------------------------------------|--------------------------------------------------------------------------------------------|
| <b>h-FABP</b><br><i>Heart-fatty acid binding protein</i><br>(1/3) | Sandwich immunoassay<br>Square-wave voltammetry (SWV) read-out                     | GCE/GRONRs/(EDC+NHS)/Ab <sub>1</sub> /T/Ab <sub>2</sub> /GA/TiPZn <sup>2+</sup> -probe | 2012 [22] | 3 fg mL <sup>-1</sup> (buffer)<br><1.7 µg mL <sup>-1</sup> (HS)               | 0.05 pg mL <sup>-1</sup> –50 ng mL <sup>-1</sup>  | ✓ Sensitivity<br>✓ Multiplexing<br>✓ Sample volume (20 µL)<br>✓ Detection in serum samples |
|                                                                   | Label-free biosensor<br>Electrochemical impedance spectroscopy (EIS) read-out      | Au/ MUA/(EDC+NHS)/Ab/T [mSAM]<br>Au/(MUA+MPOH)/(EDC+NHS)/Ab/T [hSAM]                   | 2012 [23] | 117 pg mL <sup>-1</sup> [mSAM];<br>524 pg mL <sup>-1</sup> [hSAM] (buffer)    | 98 pg mL <sup>-1</sup> –100 ng mL <sup>-1</sup>   | ✓ Label free<br>X Sensitivity<br>X Complex fabrication                                     |
|                                                                   | Immunoassay<br>Turbidimetric read-out                                              | Latex particles/T                                                                      | 2013 [24] | 2.4 ng mL <sup>-1</sup>                                                       | 2.76 ng mL <sup>-1</sup> –115 ng mL <sup>-1</sup> | X Sensitivity                                                                              |
|                                                                   | Label-free capacitive interdigitated immunosensor                                  | AuIDEs/ MUA/(EDC+NHS)/Ab/T [mSAM]<br>AuIDEs/(MUA+MPOH)/(EDC+NHS)/Ab/T [hSAM]           | 2015 [25] | 0.836 ng mL <sup>-1</sup> [mSAM]<br>0.968 ng mL <sup>-1</sup> [hSAM] (buffer) | 98 pg mL <sup>-1</sup> –100 ng mL <sup>-1</sup>   | ✓ Label free<br>✓ Sample volume (50 µL)<br>X Sensitivity<br>X Complex fabrication          |
|                                                                   | Sandwich immunoassay<br>Anodic stripping voltammetry (ASV) read-out                | GCE/CD-GS/Ab <sub>1</sub> /T/Ab <sub>2</sub> -ZnO-MWCNTs/CdS                           | 2017 [26] | 0.3 fg mL <sup>-1</sup> (buffer)<br><5 pg mL <sup>-1</sup> (HS)               | 1.3 fg mL <sup>-1</sup> –130 ng mL <sup>-1</sup>  | ✓ Sensitivity<br>✓ Multiplexing<br>✓ Sample volume (6 µL)<br>✓ Detection in serum samples  |
|                                                                   | Label-free immunosensor<br>Electrochemiluminescence (ECL) read-out                 | GCE/MOF-Ru/GA-CS/Ab/T                                                                  | 2018 [27] | 2.6 fg mL <sup>-1</sup>                                                       | 150 fg mL <sup>-1</sup> –150 ng mL <sup>-1</sup>  | ✓ Label-free<br>✓ Sensitivity<br>X Complex fabrication                                     |
|                                                                   | Lateral flow immunoassay (LFIA)<br>with quantum dots (QD)<br>Fluorescence read-out | Ab <sub>1</sub> /T/Ab <sub>2</sub> -CdTe                                               | 2018 [28] | 221 pg mL <sup>-1</sup>                                                       | 0–160 ng mL <sup>-1</sup>                         | X Sensitivity<br>✓ POC format<br>✓ Detection in blood samples                              |

| Biomarker                                                              | Brief description of method/<br>Detection approach                                                            | Sensor/Assay architecture                          | Publication year and reference         | Lower Detection Limit (1) | Range (2)                                        | Tentative suitability for POC applications ( <i>advantages/disadvantages</i> ) (3) |
|------------------------------------------------------------------------|---------------------------------------------------------------------------------------------------------------|----------------------------------------------------|----------------------------------------|---------------------------|--------------------------------------------------|------------------------------------------------------------------------------------|
| <b>h-FABP</b><br>Heart-fatty<br>acidic binding<br>protein<br><br>(2/3) | Molecularly imprinted polymer nanoparticles (nanoMIPs) biosensor<br>Thermal read-out                          | Thermocouple/MIP/T                                 | 2019 [29]                              | 1.5 ng mL <sup>-1</sup>   | 1.5 ng mL <sup>-1</sup> -75 ng mL <sup>-1</sup>  | X Sensitivity<br>✓ POC format<br>✓ Multiplexing                                    |
|                                                                        | Sandwich immunoassay<br>Paper based (μPAD) device<br>Chemiluminescence (CL) read-out                          | GA-CS/Ab1-GNP/T/Co(II)-luminol-GNP                 | 2020 [30]                              | 0.06 pg mL <sup>-1</sup>  | 0.1 pg mL <sup>-1</sup> -1 μg mL <sup>-1</sup>   | ✓ Sensitivity<br>✓ POC format<br>✓ Multiplexing                                    |
|                                                                        | Immunosensor with luminophore coupled with 2D MOF<br>Electrochemiluminescence (ECL) read-out                  | GCE/PICA/Ab1/T/Ab2-Ni-TCPP(Fe)-PEI-luminol         | 2021 [31]                              | 44.5 fg mL <sup>-1</sup>  | 100 fg mL <sup>-1</sup> -100 ng mL <sup>-1</sup> | ✓ Sensitivity<br>X Complex fabrication<br>✓ Detection in serum samples             |
|                                                                        | <i>- Commercial products (RUO/diagnostic instruments, devices, or kits) -</i>                                 |                                                    |                                        |                           |                                                  |                                                                                    |
|                                                                        | Lateral flow immunoassay (LFIA) (TBI Check ABCDx)<br>Colorimetric read-out<br><i>In vitro diagnostic test</i> | Ab1/T/Ab2-label                                    | TBI Check ABCDx [32]                   | n/a                       | n/a                                              | Intended for POC                                                                   |
|                                                                        | ELISA kit (Abcam)<br>Colorimetric read-out<br><i>Research use only</i>                                        | Microtiter plate/Ab1/T/Ab2-biotin/streptavidin HRP | Human H-FABP ELISA Kit (ab243682) [33] | n/a                       | 10.9-700 pg mL <sup>-1</sup>                     | Intended for benchtop platforms                                                    |
|                                                                        | ELISA kit (Cusabio)<br>Colorimetric read-out<br><i>Research use only</i>                                      | Microtiter plate/Ab1/T/Ab2-biotin/streptavidin HRP | ELISA Kit (CSB-E09185h)                | n/a                       | 78-5000 pg mL <sup>-1</sup>                      | Intended for benchtop platforms                                                    |

| Biomarker                                                       | Brief description of method/<br>Detection approach                                                                          | Sensor/Assay architecture                                                                           | Publication year and reference                                            | Lower Detection Limit (1)        | Range (2)                                                               | Tentative suitability for POC applications ( <i>advantages/disadvantages</i> ) (3)                  |
|-----------------------------------------------------------------|-----------------------------------------------------------------------------------------------------------------------------|-----------------------------------------------------------------------------------------------------|---------------------------------------------------------------------------|----------------------------------|-------------------------------------------------------------------------|-----------------------------------------------------------------------------------------------------|
| h-FABP<br>Heart-fatty<br>acidic binding<br>protein<br><br>(3/3) | Sandwich immunoassay kit<br>Electrochemiluminescence (ECL) read-out (MesoScale Discovery (MSD))<br><i>Research use only</i> | Microtiter plate with SPCE/Ab <sub>1</sub> /T/Ab <sub>2</sub> -SULFO TAG label                      | Human FABP3/H-FABP Antibody Set<br>MesoScale Discovery (MSD) (F214T) [34] | 90 pg mL <sup>-1</sup>           | ≤ 100 ng mL <sup>-1</sup>                                               | Intended for MesoScale Discovery instruments                                                        |
| <i>- Academic publications -</i>                                |                                                                                                                             |                                                                                                     |                                                                           |                                  |                                                                         |                                                                                                     |
| S100β<br>S100β calcium-binding protein<br><br>(1/5)             | Sandwich immunoassay<br>Fluorescence read-out                                                                               | Microtiter plate/Ab <sub>1</sub> /T/Ab <sub>2</sub> -biotin/streptavidin europium                   | 1997 [35]                                                                 | 15 pg mL <sup>-1</sup> (plasma)  | n/a                                                                     | ✓ Sensitivity<br>X Currently developed for microtiter plate format<br>✓ Detection in plasma samples |
|                                                                 | ELISA<br>Colorimetric read-out                                                                                              | Microtiter plate/Ab <sub>1</sub> /T/Ab <sub>2</sub> -HRP                                            | 1997 [36]                                                                 | 40 pg mL <sup>-1</sup> (CSF)     | 0.5-2.5 ng mL <sup>-1</sup>                                             | X Currently developed for microtiter plate format<br>✓ Detection in CSF samples                     |
|                                                                 | ELISA<br>Colorimetric read-out                                                                                              | Microtiter plate/<br>Ab <sub>1</sub> /T/Ab <sub>2</sub> /antiAb <sub>2</sub> -HRP                   | 2008 [37]                                                                 | n/a                              | 1.9 pg mL <sup>-1</sup> -10 ng mL <sup>-1</sup> (human and rat samples) | ✓ Sensitivity<br>X Currently developed for microtiter plate format<br>✓ Detection in real samples   |
|                                                                 | Sandwich immunoassay<br>Differential pulse voltammetry (DPV) read-out                                                       | Pencil graphite/PMMA/-OH(NaOH)/NH <sub>2</sub> (PEI)/GA/Ab <sub>1</sub> /T/Ab <sub>2</sub> /ALP-IgG | 2013 [38]                                                                 | 0.1 pg mL <sup>-1</sup> (buffer) | 0.1-100 pg mL <sup>-1</sup>                                             | ✓ Sensitivity<br>✓ Sample volume (20 µL)<br>X Complex fabrication                                   |
|                                                                 | Sandwich immunoassay<br>Square-wave voltammetry (SWV) read-out                                                              | Au DE/(capture peptide+TCEP)/(T+CaCl <sub>2</sub> )/(signal peptide+Cu <sup>2+</sup> )              | 2014 [39]                                                                 | 0.1 nM (buffer)<br><0.2 nM (HS)  | 0.1-25.6 nM                                                             | X Complex fabrication<br>✓ Detection in serum samples                                               |

| Biomarker                                                                                       | Brief description of method/<br>Detection approach                                             | Sensor/Assay architecture                                                                                                                      | Publication year and reference | Lower Detection Limit (1)                                                        | Range (2)                                                                                                            | Tentative suitability for POC applications ( <i>advantages/disadvantages</i> ) (3)                     |
|-------------------------------------------------------------------------------------------------|------------------------------------------------------------------------------------------------|------------------------------------------------------------------------------------------------------------------------------------------------|--------------------------------|----------------------------------------------------------------------------------|----------------------------------------------------------------------------------------------------------------------|--------------------------------------------------------------------------------------------------------|
| <b>S100<math>\beta</math></b><br><i>S100<math>\beta</math> calcium-binding protein</i><br>(2/5) | Label-free biosensor with His-RAGE domains, Osteryoung square-wave voltammetry (OSWV) read-out | Au DE/(DPTA+NAC)/Cu <sup>2+</sup> /His <sub>6</sub> -RAGE VC1 or C2/T                                                                          | 2014 [40]                      | 0.52 pM (buffer)<br>0.65 pM (HP)                                                 | 1-20 pM                                                                                                              | ✓ Label-free<br>✓ Sample volume (10 $\mu$ L)<br>X Complex fabrication<br>✓ Detection in plasma samples |
|                                                                                                 | Magnetic bead (MB) based quantum dot (QD) immunoassay<br>Fluorescence read-out                 | MB-Ab <sub>1</sub> /T/Ab <sub>2</sub> -QD                                                                                                      | 2015 [41]                      | 10 pg mL                                                                         | 0.01–30 ng mL <sup>-1</sup>                                                                                          | ✓ Sensitivity                                                                                          |
|                                                                                                 | Label-free biosensor with His-RAGE domains, Osteryoung square-wave voltammetry (OSWV) read-out | Au DE/(DPM+NAC)/Cu <sup>2+</sup> /His <sub>6</sub> -RAGE VC1 or C2/T<br>(a) (DPM+MBT)/Cu <sup>2+</sup> /His <sub>6</sub> -RAGE VC1 or C2/T (b) | 2016 [42]                      | 2.6 pM (a) (buffer)<br>4.9 pM (b) (buffer)<br>0.9 pM (a) (HP)<br>2.7 pM (b) (HP) | 2.6-20 pM (a)<br>4.9-20 pM (b)<br>0.9-20 pM (a)<br>2.7-20 pM (b)                                                     | ✓ Label free<br>✓ Sample volume (10 $\mu$ L)<br>X Complex fabrication<br>✓ Detection in plasma samples |
|                                                                                                 | Label-free biosensor<br>Differential pulse voltammetry (DPV) read-out                          | Electrografted reduced FRGG/GA/Ab/T                                                                                                            | 2017 [43]                      | 1 pg mL <sup>-1</sup> (buffer)<br>1 pg mL <sup>-1</sup> (HS and CSF)             | 1 pg mL <sup>-1</sup> -10 ng mL <sup>-1</sup> (buffer)<br>1 pg mL <sup>-1</sup> -10 ng mL <sup>-1</sup> (HS and CSF) | ✓ Label free<br>✓ Sensitivity<br>✓ Detection in serum and CSF samples                                  |
|                                                                                                 | Label-free biosensors<br>Electrochemical impedance spectroscopy (EIS) read-out                 | Au IDE/(4-ATP + cysteamine)/GA/Ab/T                                                                                                            | 2018 [44]                      | 10 ng mL <sup>-1</sup> (buffer)                                                  | 10 ng mL <sup>-1</sup> -10 $\mu$ g mL <sup>-1</sup> ( <i>vs IgG</i> )                                                | ✓ Label free<br>X Sensitivity<br>✓ Multiplexing                                                        |
|                                                                                                 | Surface-enhanced Raman scattering (SERS) biosensor                                             | ITO/HAuNPs/DMSA + EDC-NHS/Ab <sub>1</sub> /HAuNPs/4-MBA(NBA)/EDC-NHS/Ab <sub>2</sub>                                                           | 2018 [45]                      | 0.06 ng mL <sup>-1</sup>                                                         | 0.2-22 ng mL <sup>-1</sup>                                                                                           | ✓ Sensitivity<br>✓ Multiplexing<br>X Complex fabrication                                               |
|                                                                                                 | Sandwich immunoassay<br>Field-effect enzymatic detection (FEED)                                | Carbon SPE/SWCNTs-Nafion-GA/Ab <sub>1</sub> /T/HRP-Ab <sub>2</sub>                                                                             | 2018 [46]                      | 10 fg mL <sup>-1</sup> (HS)                                                      | 10 fg mL <sup>-1</sup> -10 ng mL <sup>-1</sup>                                                                       | ✓ Reagent-less<br>✓ Sensitivity<br>✓ Detection in serum samples                                        |

| Biomarker                                                     | Brief description of method/<br>Detection approach                                            | Sensor/Assay architecture                                                               | Publication year and reference | Lower Detection Limit (1)                                              | Range (2)                                       | Tentative suitability for POC applications ( <i>advantages/disadvantages</i> ) (3)     |
|---------------------------------------------------------------|-----------------------------------------------------------------------------------------------|-----------------------------------------------------------------------------------------|--------------------------------|------------------------------------------------------------------------|-------------------------------------------------|----------------------------------------------------------------------------------------|
| <b>S100β</b><br><i>S100β calcium-binding protein</i><br>(3/5) | Lateral flow immunoassay (LFIA)<br>Square-wave voltammetry (SWV) or SERS read-out             | FTO/AgNPs/Au/4-MBA/Ab/T                                                                 | 2019 [47]                      | 10 pg mL <sup>-1</sup> (buffer)<br><1.8 ng mL <sup>-1</sup> (HS)       | 50 pg mL <sup>-1</sup> -1 µg mL <sup>-1</sup>   | ✓ Label free<br>✓ Sensitivity<br>✓ Multiplexing<br>✓ Detection in serum samples        |
|                                                               | Sandwich immunoassay<br>Photo-electrochemical (PEC) read-out                                  | ITO/rGRO-AuNPs/3-ICT-sol-gel-film/Ab <sub>1</sub> /T/Ab <sub>2</sub> /(EDC+NHS)/CdS-QDs | 2019 [48]                      | 0.15 pg mL <sup>-1</sup> (buffer)<br><100 pg mL <sup>-1</sup> (HS)     | 0.25-10000 pg mL <sup>-1</sup>                  | ✓ Sensitivity<br>✓ Detection in serum samples<br>X Complex fabrication                 |
|                                                               | Surface plasmon resonance (SPR) biosensor                                                     | Point-of-care SPR module (PhotonicSys SPR H5)<br>Au sensor/MUA/EDC-NHS/Ab/T             | 2019 [49]                      | 0.75 ng mL <sup>-1</sup> (water)<br>0.136 ng mL <sup>-1</sup> (plasma) | 0.25–10 ng mL <sup>-1</sup>                     | X Sensitivity<br>✓ Multiplexing<br>✓ POC format<br>✓ Detection in plasma samples       |
|                                                               | Biosensor with C/AuNCs nanoprobe<br>Fluorescent read-out                                      | C/AuNCs/TRTK-12 peptide/Ca <sup>2+</sup> /T                                             | 2020 [50]                      | 0.01 µg mL <sup>-1</sup>                                               | 0.03-1 µg mL <sup>-1</sup>                      | X Sensitivity                                                                          |
|                                                               | Protein reduction/chemisorption on electrode<br>Differential pulse voltammetry (DPV) read-out | Au DE<br>Recognition probe: MBs/Au/Ab/T                                                 | 2020 [51]                      | 10 pM (buffer)<br><250 pM (horse plasma)                               | 10 pM-100 nM                                    | ✓ Label free<br>✓ Sample volume (50 µL)<br>X Limited to analytes with disulphide bonds |
|                                                               | Lateral flow immunoassay (LFIA)<br>SERS read-out                                              | Ab <sub>1</sub> /T/Ab <sub>2</sub> -SERS probe                                          | 2021 [52]                      | 5 pg mL <sup>-1</sup> (HP)                                             | 5 pg mL <sup>-1</sup> - 100 ng mL <sup>-1</sup> | ✓ Sensitivity<br>✓ Detection in plasma samples<br>✓ POC format                         |

| Biomarker                                                                                           | Brief description of method/<br>Detection approach                                                                       | Sensor/Assay architecture                                                    | Publication year and reference              | Lower Detection Limit (1)   | Range (2)                                                                                                   | Tentative suitability for POC applications ( <i>advantages/disadvantages</i> ) (3)     |
|-----------------------------------------------------------------------------------------------------|--------------------------------------------------------------------------------------------------------------------------|------------------------------------------------------------------------------|---------------------------------------------|-----------------------------|-------------------------------------------------------------------------------------------------------------|----------------------------------------------------------------------------------------|
| <i>- Commercial products (RUO/diagnostic instruments, devices, or kits) -</i>                       |                                                                                                                          |                                                                              |                                             |                             |                                                                                                             |                                                                                        |
| <b>S100<math>\beta</math></b><br><i>S100<math>\beta</math> calcium-binding protein</i><br><br>(4/5) | Sandwich immunoassay<br>Electrochemiluminescence (ECL) read-out<br>(Roche Diagnostics)<br><i>In vitro diagnostic kit</i> | MB/Ab <sub>1</sub> /T/Ab <sub>2</sub> -ECL label                             | Elecsys® S100 test kit for human serum [53] | 15 pg mL <sup>-1</sup> (HS) | 0.005-39 $\mu$ g mL <sup>-1</sup> (cobas e411, e601/e602)<br>0.015-30 $\mu$ g mL <sup>-1</sup> (cobas e801) | Intended for Roche cobas instruments<br>cobas e411, cobas e601, cobas e602; cobas e801 |
|                                                                                                     | Metal-oxide semi-conductive (CMOS) compatible nanosensors (NanoDx)                                                       | Nanowires/Ab/T                                                               | TBI Duplex (GFAP & S100 $\beta$ ) [21]      | n/a                         | n/a                                                                                                         | Intended for POC<br><i>Prototype under development</i>                                 |
|                                                                                                     | CLIA kit (DiaSorin Liaison®)<br>Chemiluminescence (CL) read-out<br><i>In vitro diagnostic kit</i>                        | MB-Ab <sub>1</sub> /T/Ab <sub>2</sub> -label/substrate                       | S100 test kit [54]                          | 20 pg mL <sup>-1</sup> (HS) | n/a                                                                                                         | Intended for Diasorin Liaison instruments                                              |
|                                                                                                     | ELISA kit (Fujirebio CanAg)<br>Colorimetric read-out<br><i>Research use only</i>                                         | Microtiter plate/Ab <sub>1</sub> /T/Ab <sub>2</sub> -biotin/streptavidin HRP | S100 EIA [55]                               | 10 pg mL <sup>-1</sup> (HS) | 0-3500 ng mL <sup>-1</sup>                                                                                  | Intended for benchtop platforms                                                        |
|                                                                                                     | ELISA kit (Sigma Aldrich)<br>Colorimetric read-out<br><i>Research use only</i>                                           | Microtiter plate/Ab <sub>1</sub> /T/Ab <sub>2</sub> -biotin/streptavidin HRP | Human S100B, EZHS100B-33K [56]              | n/a                         | 2.7-2000 pg mL <sup>-1</sup>                                                                                | Intended for benchtop platforms                                                        |
|                                                                                                     | ELISA kit (Abcam)<br>Colorimetric read-out<br><i>Research use only</i>                                                   | Microtiter plate/Ab <sub>1</sub> /T/Ab <sub>2</sub> -biotin/streptavidin HRP | S100B ELISA Kit (ab234573) [57]             | n/a                         | 0.31-20 ng mL <sup>-1</sup>                                                                                 | Intended for benchtop platforms                                                        |
|                                                                                                     | ELISA kit (Lucerna Chem)<br>Colorimetric read-out<br><i>Research use only</i>                                            | Microtiter plate/Ab <sub>1</sub> /T/Ab <sub>2</sub> -biotin/streptavidin HRP | Human S100B [58]                            | n/a                         | 93.75-6000 pg mL <sup>-1</sup>                                                                              | Intended for benchtop platforms                                                        |

| Biomarker                                                     | Brief description of method/<br>Detection approach                              | Sensor/Assay architecture                                                        | Publication year and reference                      | Lower Detection Limit (1) | Range (2)                     | Tentative suitability for POC applications ( <i>advantages/disadvantages</i> ) (3) |
|---------------------------------------------------------------|---------------------------------------------------------------------------------|----------------------------------------------------------------------------------|-----------------------------------------------------|---------------------------|-------------------------------|------------------------------------------------------------------------------------|
| S100 $\beta$<br>S100 $\beta$ calcium-binding protein<br>(5/5) | ELISA kit (Genway Biotech)<br>Colorimetric read-out<br><i>Research use only</i> | Microtiter plate/Ab <sub>1</sub> /T/Ab <sub>2</sub> -<br>biotin/streptavidin HRP | S100b ELISA<br>Kit (Rabbit)<br>(GWB-KBBVZ1)<br>[59] | n/a                       | 15.6-1000 pg mL <sup>-1</sup> | Intended for benchtop platforms                                                    |

(1) Lowest reported LDL using EC detection methods; 'x' corresponds to the lowest concentration analyzed within the working range of the sensor (employing standard addition method and/or a reference material/method for validation, with a decent recovery), actual LDL being possibly lower than the indicated value. (2) The upper limit of the range indicated often presents the maximum concentration explored but not the upper detection limit. Please consult original paper for details. (3) Assessing the suitability for POC clinical diagnostic applications is difficult particularly if the described approaches are in early, e.g., proof-of-principle phase. For instance, many publications do not provide robustness, repeatability / reproducibility data (e.g., with real samples) nor have cost-of-goods produced (COGP), manufacturability and usability aspects (e.g., time to results) considered. A check sign (✓) in the table denotes a positive aspect observed, while a cross (X) either means a possibly problematic approach (for product development) or absence or limited key data provided. For further details on electrochemical methods reported for detection of mTBI biomarkers the readers could refer to the article from Pankratova *et al.* [60].

**Abbreviations:** 3-ICT: (3-Isocyanatopropyl)triethoxysilane; 4-ATP: 4-aminothiophenol; 4-MBA: 4-mercaptobenzoic acid; Ab: antibody; AEDP: monomer, 2-acrylamidoethyl dihydrogen phosphate; AIBN: 2,2'-azoisobutyronitrile; ALP: alkaline phosphatase; ASV: anodic stripping voltammetry; Au: gold electrode; AuNCS: gold nanoclusters; CD: carbon dots; CD-GS:  $\beta$ -cyclodextrin-graphene sheets; CL: chemiluminescence; CLIA: chemiluminescence immunoassay; CM EU: Carboxylate-modified polystyrene Eu(iii) chelate microparticles; CS: chitosan; CSV: cathodic stripping voltammetry; DE: disc electrode; DMAA: monomer, dimethylacrylamide; DPASV: differential pulse anodic stripping voltammetry; DPM: dipyrromethene; DPTA: thiol derivative of pentetic acid; DTSP: dithiobis (succinimidyl propionate); DPV: differential pulse voltammetry; ECL: electrochemiluminescence; EDC: 1-ethyl-3-(3-dimethylaminopropyl) carbodiimide; EDTA: Ethylenediaminetetraacetic acid; EGDMA: ethylene glycol dimethylacrylate; EIA: enzyme immunoassay; EIS: electrochemical impedance spectroscopy; ELISA: enzyme linked immunosorbent assay; FED: field-effect based detection (voltage controlled current amplification); FEED: field-effect enzymatic detection; FRGG: p-Nitrobenzene diazonium tetrafluoroborate (Fast Red GG salt); FTO: fluorine-doped tin oxide; GA: glutaraldehyde; GCE: glassy carbon electrode; GNP: gold nanoparticles; GRONRs: graphene oxide nanoribbons; HAuNPs: hollow gold nanoparticles; HRP: horseradish peroxidase; hSAM: homogenous self-assembled monolayer; IDE: interdigitated electrode; ITO: indium tin oxide; LFIA: lateral flow immunoassay; MB: magnetic beads; MBT: 4-mercaptobutanol; MCOH: mercaptoethanol; MDEA: microdisc electrode array; MECS: macroelectrode with a comb structure; MHDA: mercaptohexadecanoic acid; MIP: molecularly imprinted polymer; MOF: metal-organic framework; MPOH: 3-mercaptopropanol; mSAM: mixed self-assembled monolayer; MWCNTs: multiwalled carbon nanotubes; MUA: 11-Mercaptoundecanoic acid; NAC: N-acetylcysteamine; NHS: N-hydroxysuccinimide; NTCDI: naphthalenetetracarboxylic diimide; OFET: organic field effect transistor; OSWV: Osteryoung square-wave voltammetry; PAA: polyacrylic acid; PEC: photo-electrochemical; PEG: polyethylene glycol; PEI: poly(ethyleneimine); PICA: poly (indole-5-carboxylic acid); PMMA: poly(methyl methacrylate); PS: polystyrene; PS-MA: polystyrene-co-methacrylic acid; RAGE: receptor domains for advanced glycation end products (three extracellular immunoglobulin domains: V, C1, C2); rGRO: reduced graphene oxide; SAM(s): self-assembled monolayer(s); SDS: sodium-dodecyl sulphate; SERS: surface enhanced Raman spectroscopy; SFI: single frequency impedance; SPCE: screen printed carbon electrode; S-S: disulfide bridge; SWCNTs: single-walled carbon nanotubes; SWV: square wave voltammetry; T: target; TCEP: tris (2-carboxyethyl) phosphine hydrochloride; TCPP: tetrakis (4-carboxyphenyl) porphyrin; TFT: thin film transistor; TRF: time-resolved fluorescence; QCM: quartz crystal microbalance; QD: quantum dot; QLISA: quantum dot-linked immunosorbent assays.

**Figure S1:** Four-parameter (4PL) dose-response nonlinear regression model for MSD calibration curves.

## GFAP

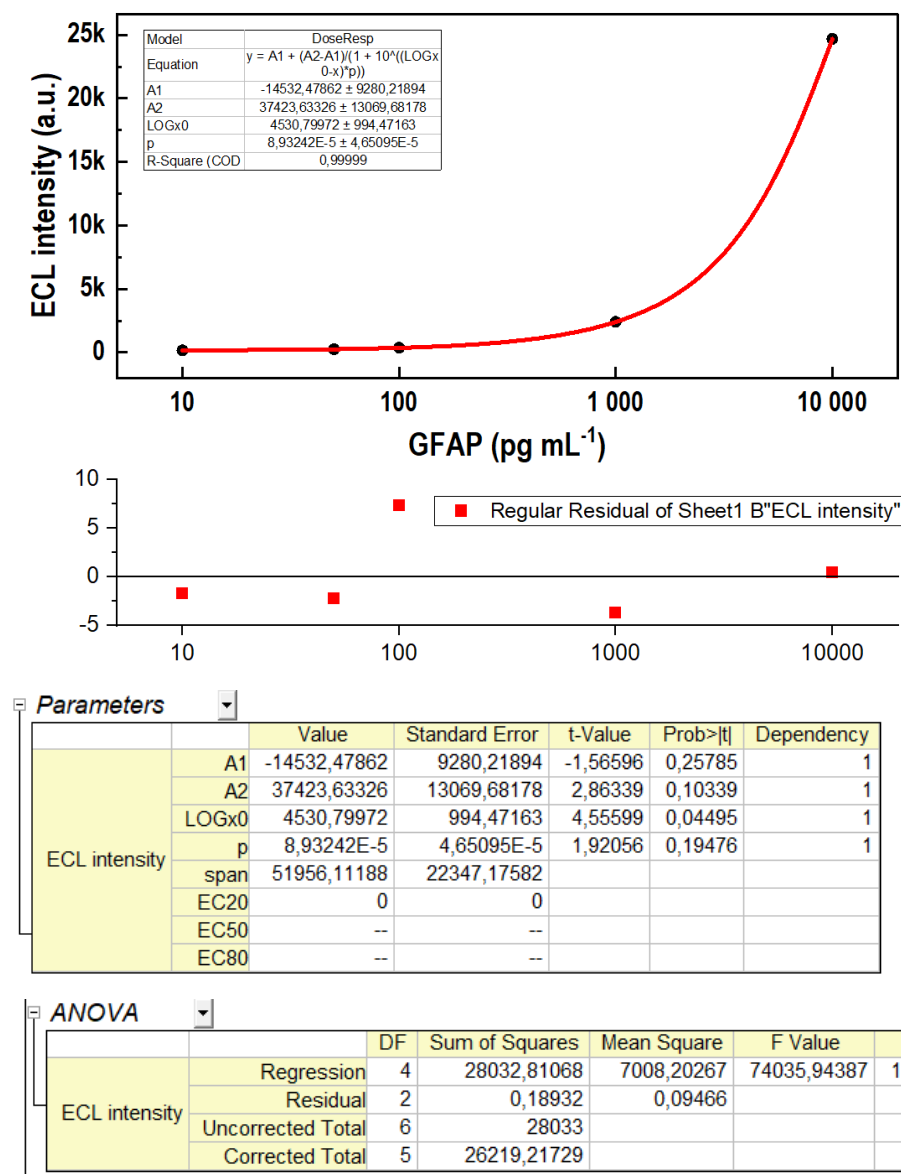

## h-FABP

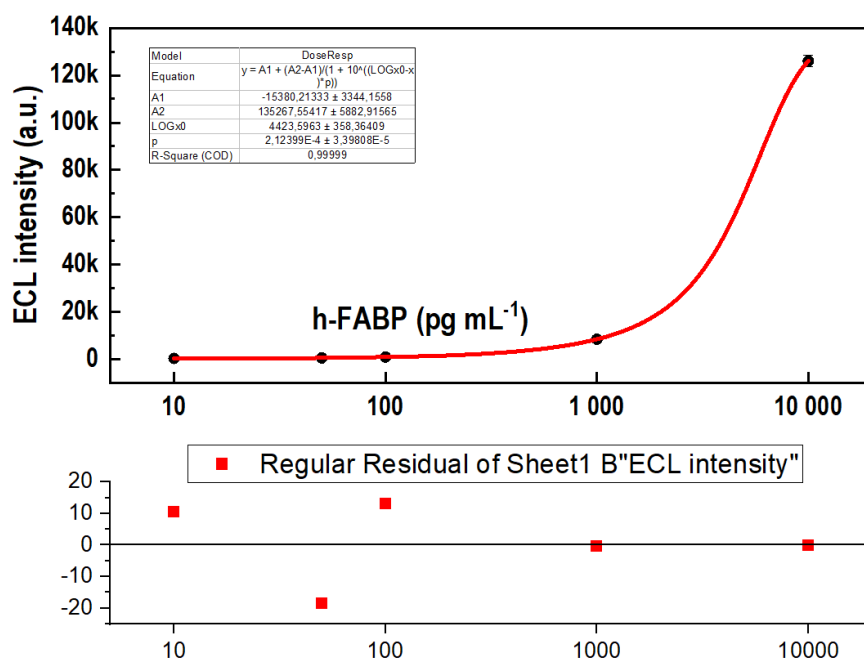

| Parameters    |       |              |                |          |         |            |
|---------------|-------|--------------|----------------|----------|---------|------------|
|               |       | Value        | Standard Error | t-Value  | Prob> t | Dependency |
| ECL intensity | A1    | -15380,21333 | 3344,1558      | -4,59913 | 0,04417 | 0,99999    |
|               | A2    | 135267,55417 | 5882,91565     | 22,99328 | 0,00189 | 0,99987    |
|               | LOGx0 | 4423,5963    | 358,36409      | 12,34386 | 0,0065  | 0,99999    |
|               | p     | 2,12399E-4   | 3,39808E-5     | 6,25056  | 0,02465 | 1          |
|               | span  | 150647,76751 | 9217,74601     |          |         |            |
|               | EC20  | --           | --             |          |         |            |
|               | EC50  | --           | --             |          |         |            |
|               | EC80  | --           | --             |          |         |            |

| ANOVA         |                   |    |                |             |           |           |
|---------------|-------------------|----|----------------|-------------|-----------|-----------|
|               |                   | DF | Sum of Squares | Mean Square | F Value   | Prob>F    |
| ECL intensity | Regression        | 4  | 136120,8513    | 34030,21282 | 45923,536 | 2,1775E-5 |
|               | Residual          | 2  | 1,48204        | 0,74102     |           |           |
|               | Uncorrected Total | 6  | 136122,33333   |             |           |           |
|               | Corrected Total   | 5  | 133666,65886   |             |           |           |

## S100β

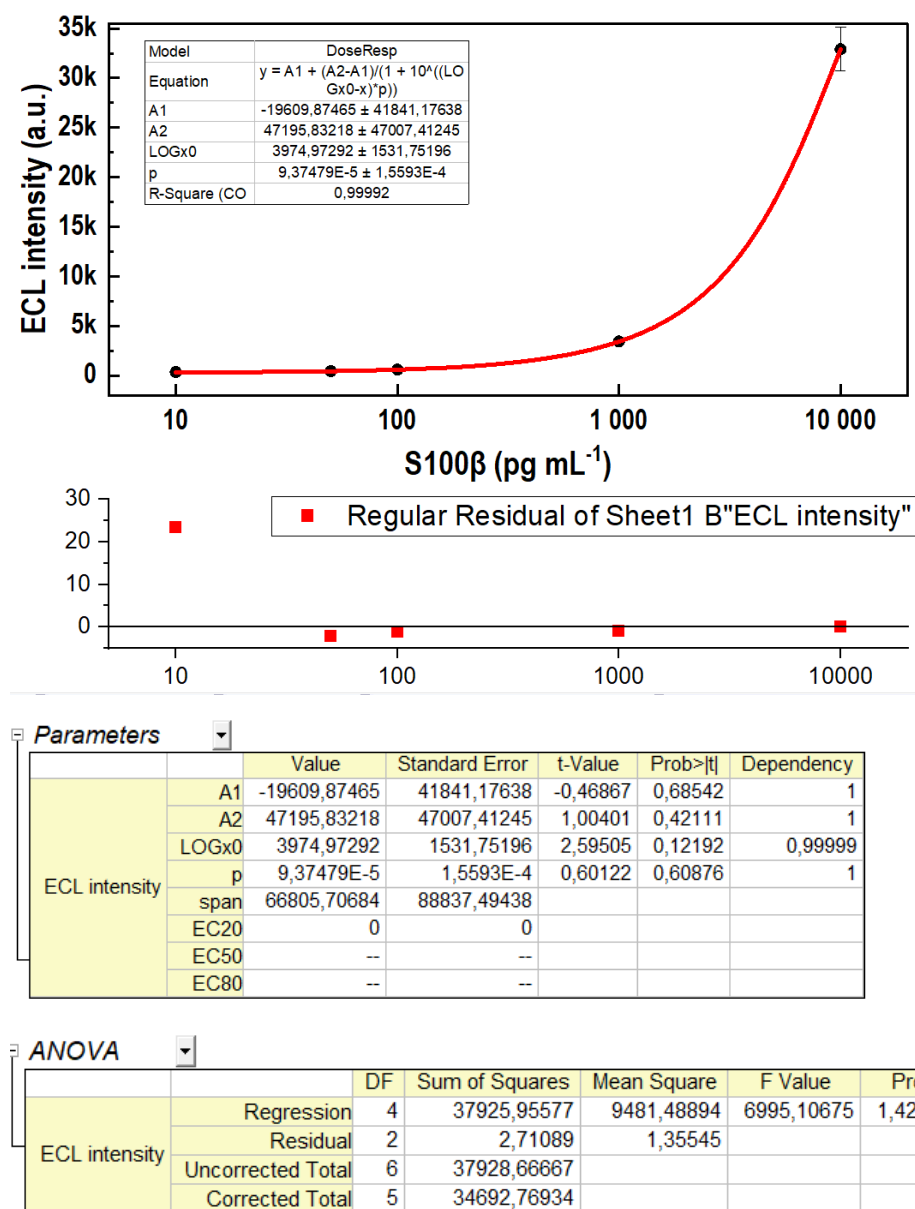

**Figure S1.** Four-parameter (4PL) dose-response nonlinear regression model for MSD calibration curves.

**Figure S2:** Electrochemical characterization of commercially available Screen-Printed Electrodes (SPEs) for ECL applications.

(a)

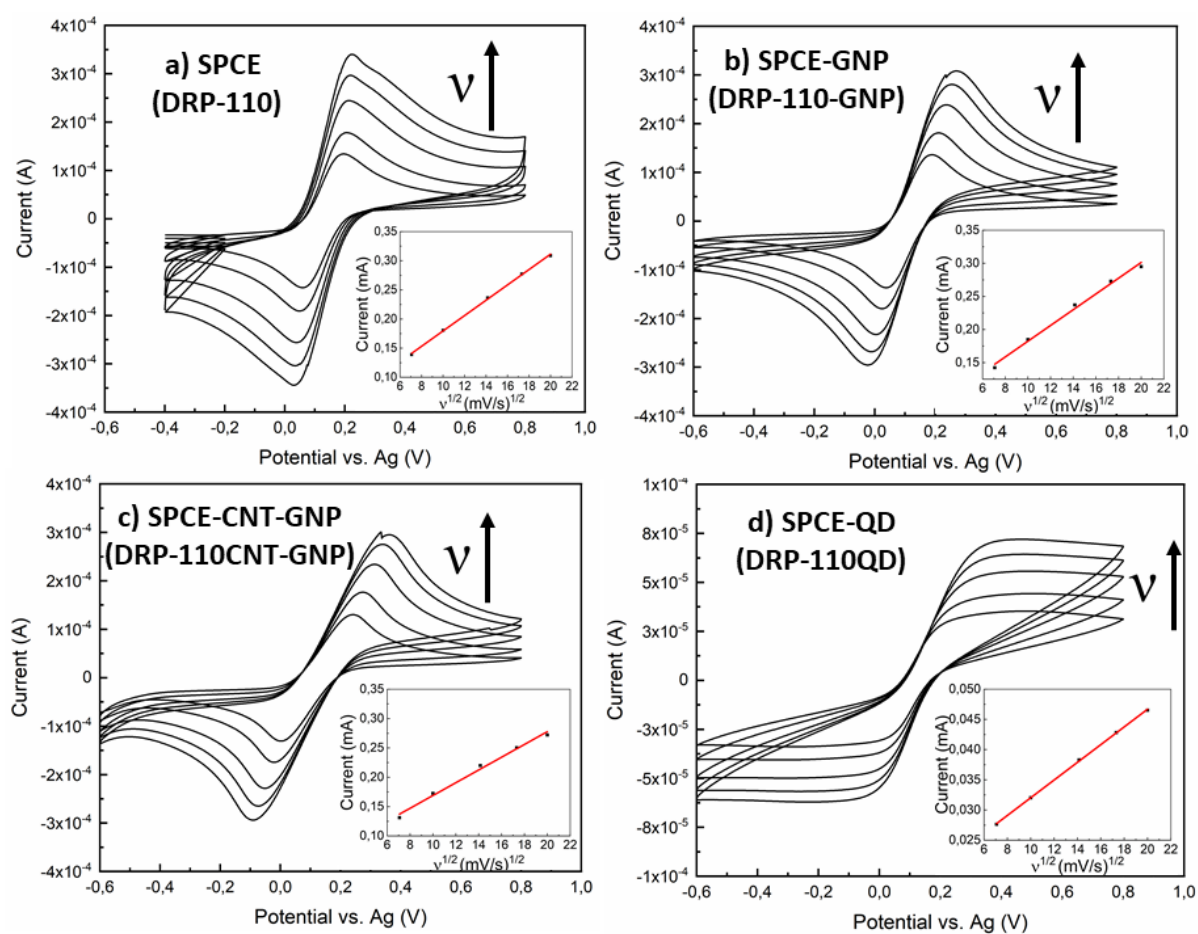

(b)

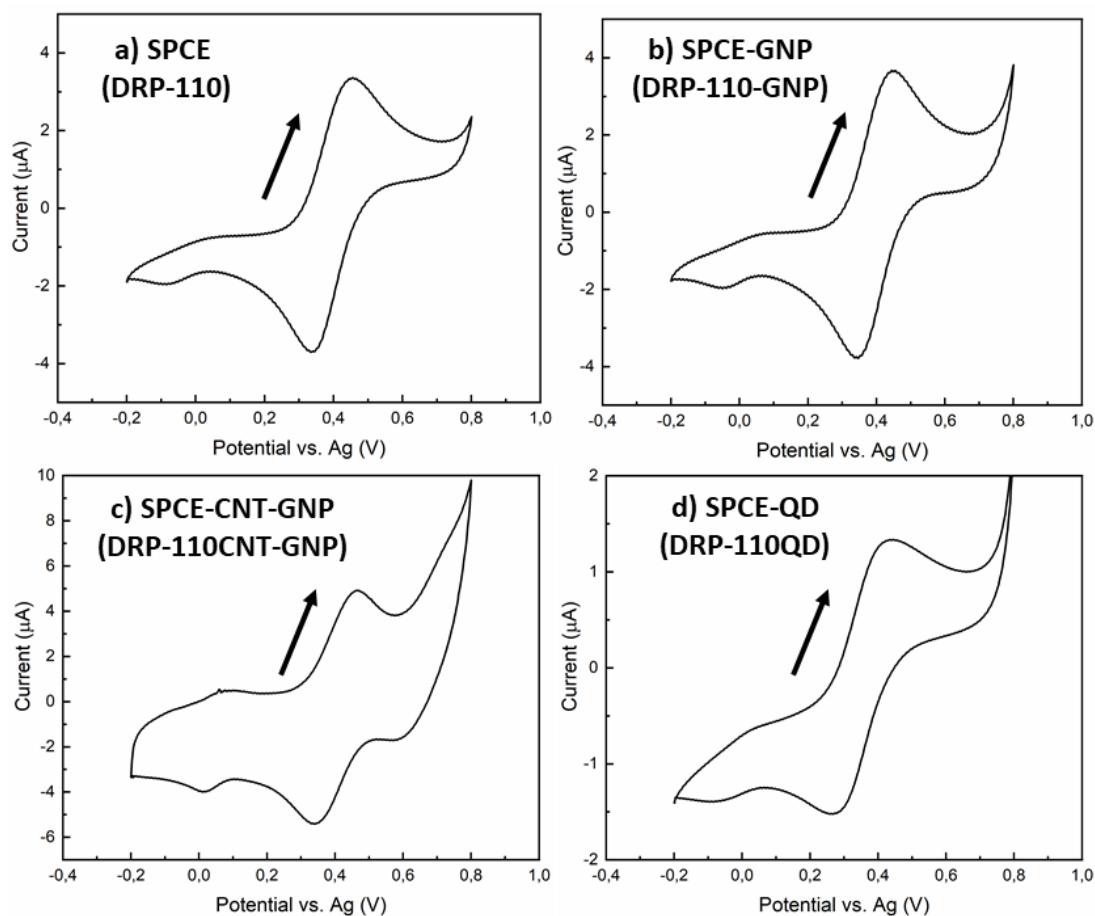

**Figure S2. (a)** Representative cyclic voltammograms of 5 mM  $K_4[Fe(CN)_6]/K_3[Fe(CN)_6]$  in PBS 1X (scan rates 50 mV/s, 100 mV/s, 200 mV/s, 300 mV/s and 400 mV/s) for: a) SPCE, b) SPCE-GNP, c) SPCE-CNT-GNP, d) SPCE-QD. Inset plot shows variation of peak current with scan rate, used to calculate the electroactive area of each electrode. **(b)** Representative cyclic voltammograms of 4 mM  $[Ru(bpy)_3]^{2+}$  in PBS 1X (scan rate 0.1 V/s): a) SPCE (DRP-110), b) SPCE-GNP (DRP-110-GNP), c) SPCE-CNT-GNP (DRP-110CNT-GNP), d) SPCE-QD (DRP-110QD).

**Figure S3:** SEM images of commercially available Screen-Printed Carbon Electrodes (SPCE) for ECL applications.

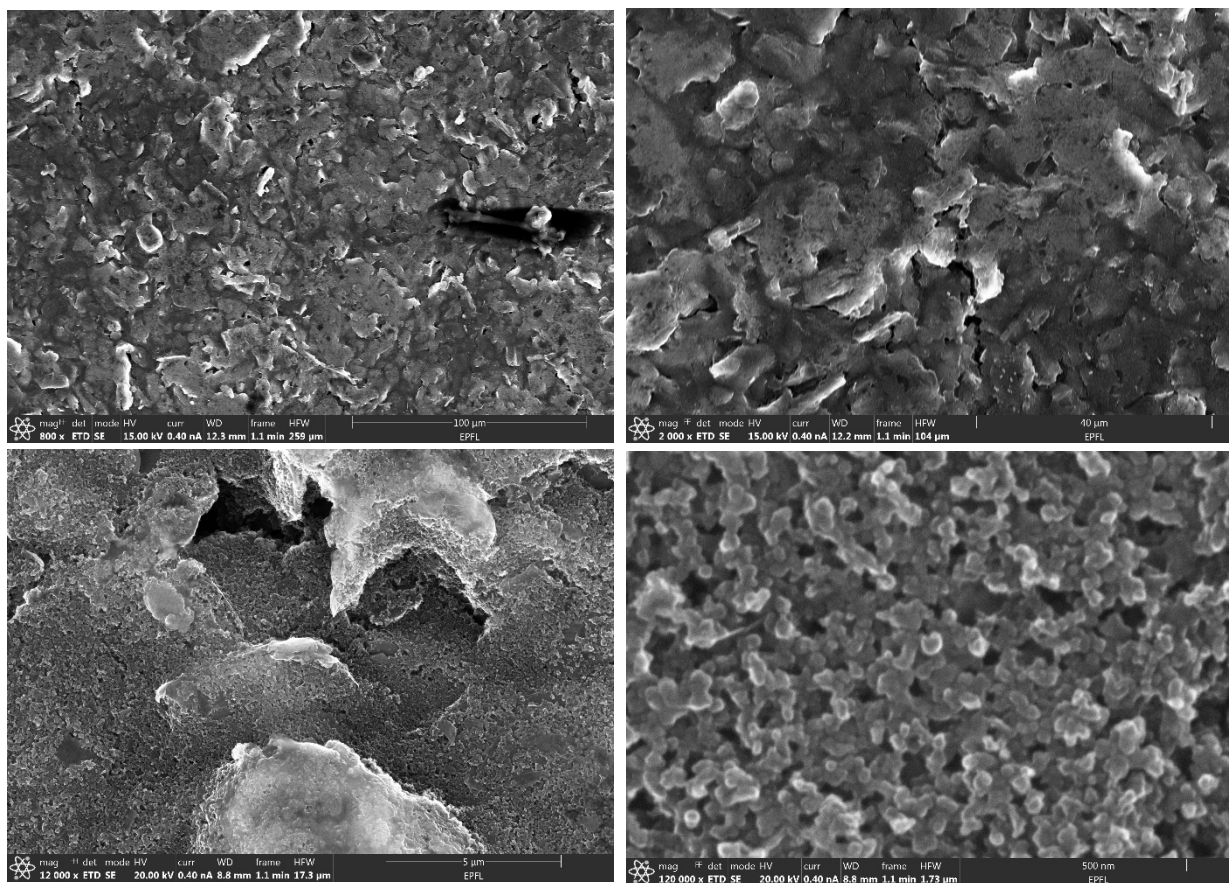

**Figure S3.** SEM images of SPCE (DRP-110) obtained with different magnifications (FEI Teneo scanning electron microscope (SEM) operated in high vacuum mode).

**Figure S4:** Linear regression model for SPCE  $\mu$ STAT-ECL calibration curves.

## GFAP

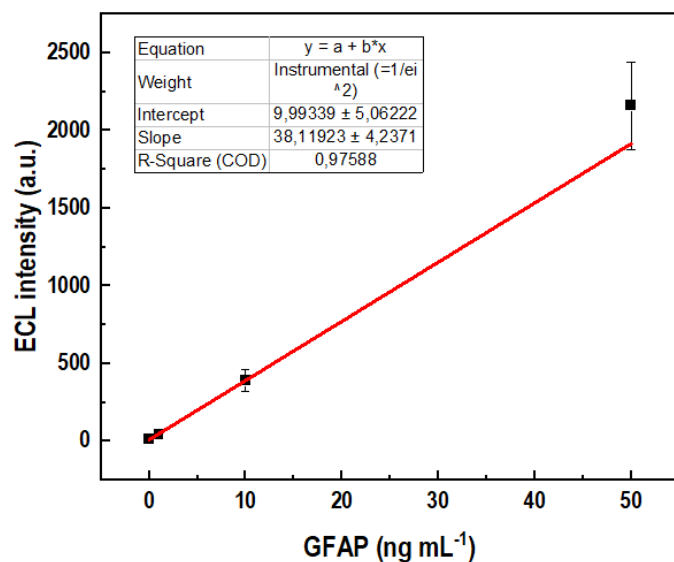

Parameters

|               |           | Value    | Standard Error | t-Value | Prob> t |
|---------------|-----------|----------|----------------|---------|---------|
| ECL intensity | Intercept | 9,99339  | 5,06222        | 1,97411 | 0,18707 |
|               | Slope     | 38,11923 | 4,23716        | 8,99641 | 0,01213 |

Slope is significantly different from zero (See ANOVA Table).

Standard Error was scaled with square root of reduced Chi-Sqr.

Statistics

|                         | ECL intensity |
|-------------------------|---------------|
| Number of Points        | 4             |
| Degrees of Freedom      | 2             |
| Residual Sum of Squares | 2,2572        |
| Pearson's r             | 0,98787       |
| R Value                 | 0,98787       |
| R-Square (COD)          | 0,97588       |
| Adj. R-Square           | 0,96383       |

Summary

|               | Intercept |                | Slope    |                | Statistics     |               |
|---------------|-----------|----------------|----------|----------------|----------------|---------------|
|               | Value     | Standard Error | Value    | Standard Error | R-Square (COD) | Adj. R-Square |
| ECL intensity | 9,99339   | 5,06222        | 38,11923 | 4,23716        | 0,97588        | 0,96383       |

ANOVA

|               |       | DF | Sum of Squares | Mean Square | F Value  | Prob>F  |
|---------------|-------|----|----------------|-------------|----------|---------|
| ECL intensity | Model | 1  | 91,34366       | 91,34366    | 80,93546 | 0,01213 |
|               | Error | 2  | 2,2572         | 1,1286      |          |         |
|               | Total | 3  | 93,60086       |             |          |         |

## h-FABP

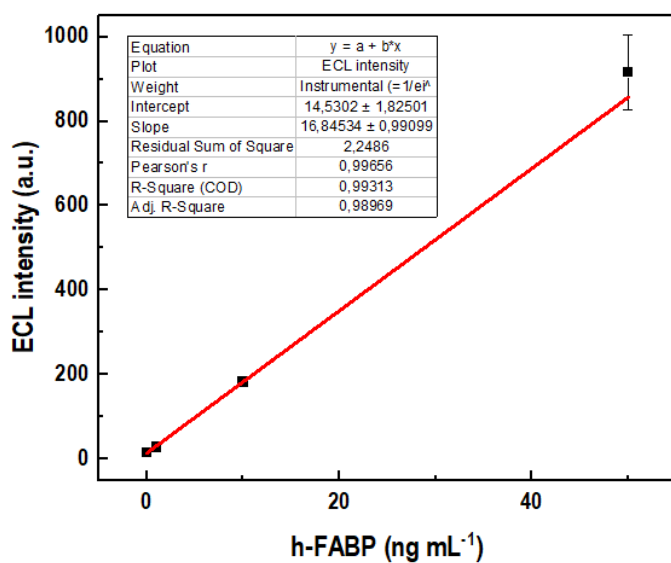

Parameters

|               |           | Value    | Standard Error | t-Value  | Prob> t |
|---------------|-----------|----------|----------------|----------|---------|
| ECL intensity | Intercept | 14,5302  | 1,82501        | 7,96171  | 0,01541 |
|               | Slope     | 16,84534 | 0,99099        | 16,99857 | 0,00344 |

Slope is significantly different from zero (See ANOVA Table).  
Standard Error was scaled with square root of reduced Chi-Sqr.

Statistics

|                         | ECL intensity |
|-------------------------|---------------|
| Number of Points        | 4             |
| Degrees of Freedom      | 2             |
| Residual Sum of Squares | 2,2486        |
| Pearson's r             | 0,99656       |
| R-Square (COD)          | 0,99313       |
| Adj. R-Square           | 0,98969       |

Summary

|               | Intercept |                | Slope    |                | Statistics    |
|---------------|-----------|----------------|----------|----------------|---------------|
|               | Value     | Standard Error | Value    | Standard Error | Adj. R-Square |
| ECL intensity | 14,5302   | 1,82501        | 16,84534 | 0,99099        | 0,98969       |

ANOVA

|               |       | DF | Sum of Squares | Mean Square | F Value   | Prob>F  |
|---------------|-------|----|----------------|-------------|-----------|---------|
| ECL intensity | Model | 1  | 324,86804      | 324,86804   | 288,95122 | 0,00344 |
|               | Error | 2  | 2,2486         | 1,1243      |           |         |
|               | Total | 3  | 327,11664      |             |           |         |

## S100β

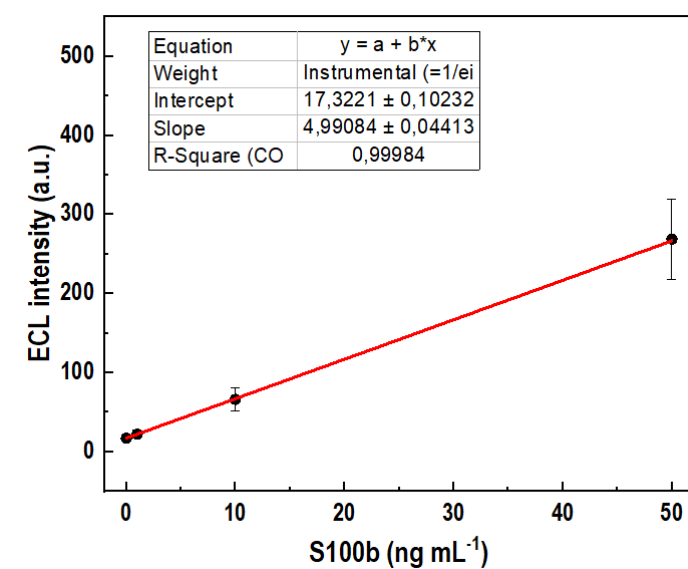

Parameters

|               |           | Value   | Standard Error | t-Value   | Prob> t    |
|---------------|-----------|---------|----------------|-----------|------------|
| ECL intensity | Intercept | 17,3221 | 0,10232        | 169,29125 | 3,48906E-5 |
|               | Slope     | 4,99084 | 0,04413        | 113,10552 | 7,81594E-5 |

Slope is significantly different from zero (See ANOVA Table).

Standard Error was scaled with square root of reduced Chi-Sqr.

Statistics

|                         | ECL intensity |
|-------------------------|---------------|
| Number of Points        | 4             |
| Degrees of Freedom      | 2             |
| Residual Sum of Squares | 0,00561       |
| Pearson's r             | 0,99992       |
| R Value                 | 0,99992       |
| R-Square (COD)          | 0,99984       |
| Adj. R-Square           | 0,99977       |

Summary

|               | Intercept |                | Slope   |                | Statistics     |               |
|---------------|-----------|----------------|---------|----------------|----------------|---------------|
|               | Value     | Standard Error | Value   | Standard Error | R-Square (COD) | Adj. R-Square |
| ECL intensity | 17,3221   | 0,10232        | 4,99084 | 0,04413        | 0,99984        | 0,99977       |

ANOVA

|               |       | DF | Sum of Squares | Mean Square | F Value     | Prob>F     |
|---------------|-------|----|----------------|-------------|-------------|------------|
| ECL intensity | Model | 1  | 35,86231       | 35,86231    | 12792,85835 | 7,81594E-5 |
|               | Error | 2  | 0,00561        | 0,0028      |             |            |
|               | Total | 3  | 35,86792       |             |             |            |

**Figure S4.** Linear regression model for SPCE  $\mu$ STAT-ECL calibration curves.

**Figure S5:** Results of the recovery studies.

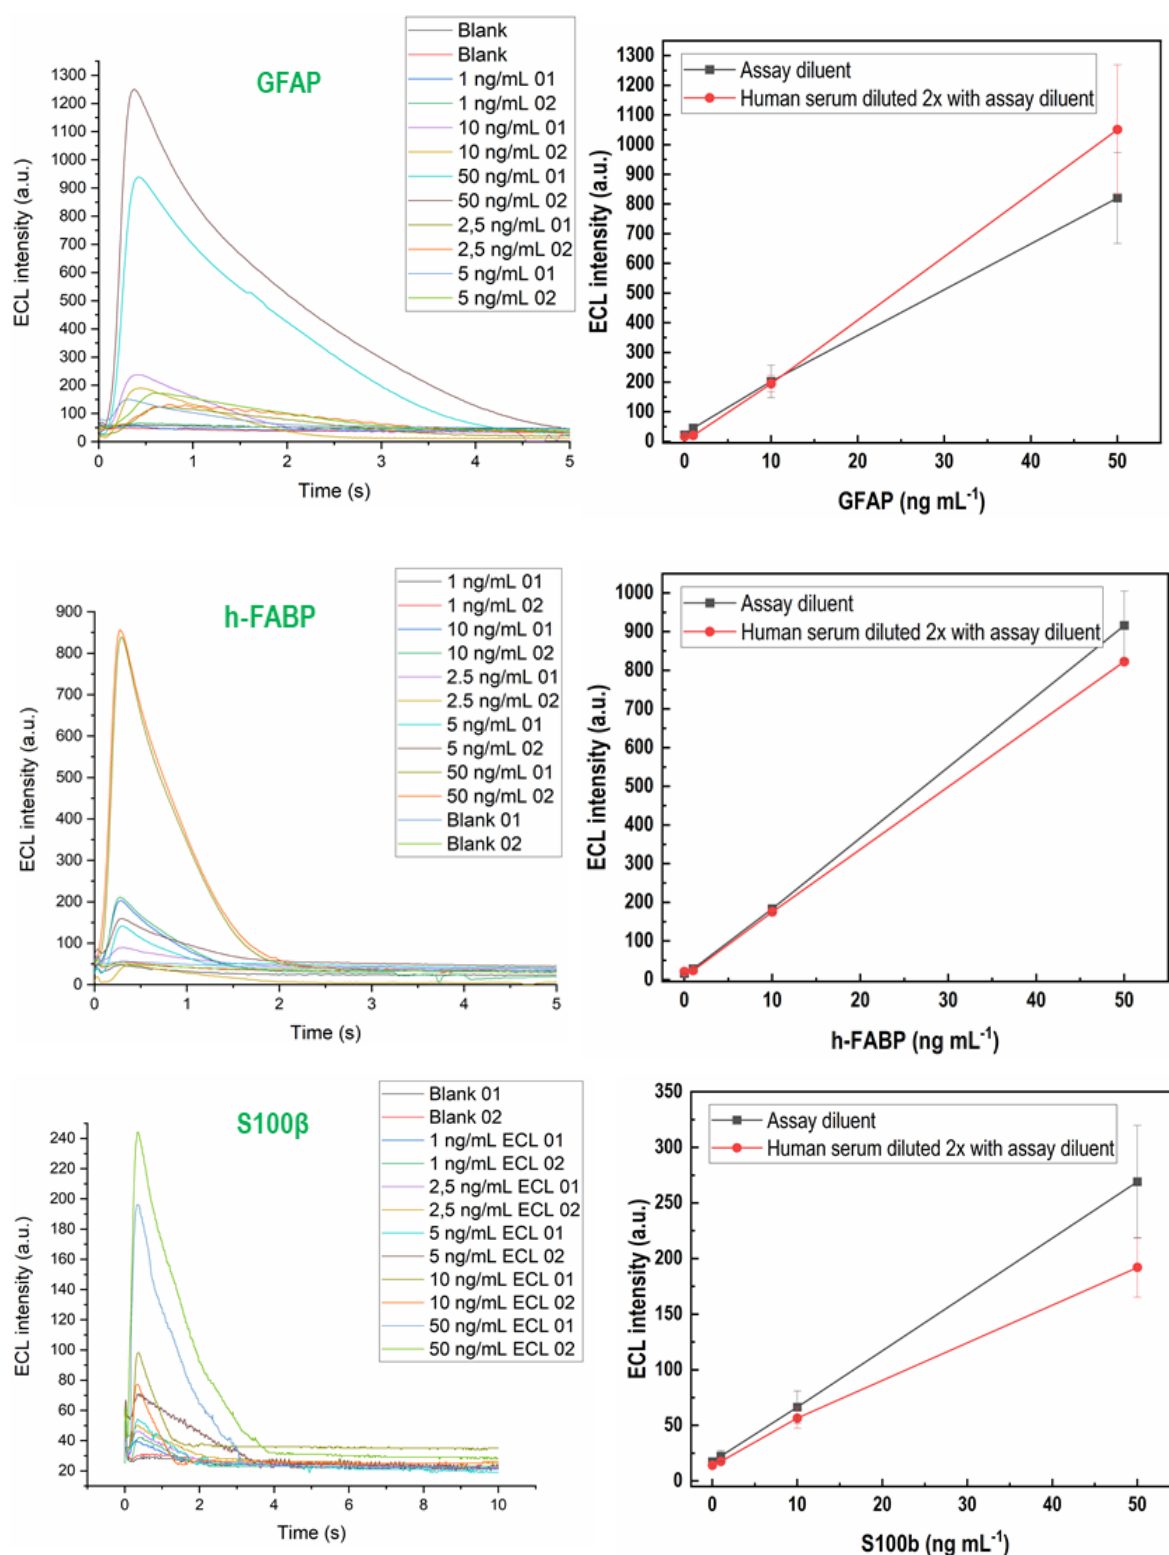

**Figure S5.** Left figures – chronoamperograms obtained for measurements of serum samples diluted 2x with the respective assay diluent and spiked with various concentrations of GFAP, h-FABP and S100β biomarkers (0 ng mL<sup>-1</sup>, 1 ng mL<sup>-1</sup>, 5 ng mL<sup>-1</sup>, and 10 ng mL<sup>-1</sup>) (n = 2, recoveries calculated for 2.5 ng mL<sup>-1</sup> and 5 ng mL<sup>-1</sup>, calculated recoveries in Table 5). Right figures – calibration curves for GFAP, h-FABP and S100β biomarkers obtained in each respective assay diluent (black line) and in serum samples diluted 2x with the respective assay diluent (red line).

**Figure S6:** CAD drawing of incubation cells used for SPEs.

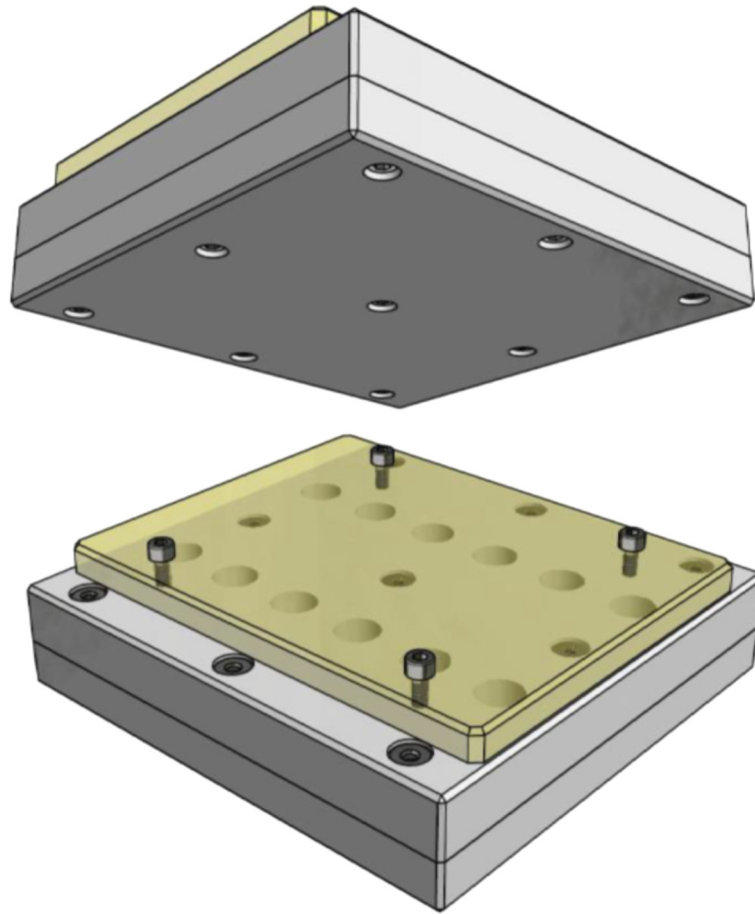

**Figure S6.** CAD drawing of customized incubation cell for SPEs fabricated at the HES-SO Valais-Wallis mechanical workshop for the Master Thesis project of Mr. Edis Saini at HES-SO entitled *“Conceptualization and development of a multiplex, high-sensitivity immunodiagnostic assay for neuropathologies”*.

## References

1. Arya, S.K.; Pui, T.S.; Wong, C.C.; Kumar, S.; Rahman, A.R.A. Effects of the Electrode Size and Modification Protocol on a Label-Free Electrochemical Biosensor. *Langmuir* **2013**, *29*, 6770–6777.
2. Huang, W.; Besar, K.; LeCover, R.; Dullloor, P.; Sinha, J.; Martínez Hardigree, J.F.; Pick, C.; Swavola, J.; Everett, A.D.; Frechette, J.; et al. Label-Free Brain Injury Biomarker Detection Based on Highly Sensitive Large Area Organic Thin Film Transistor with Hybrid Coupling Layer. *Chem. Sci.* **2014**, *5*, 416–426.
3. Wang, T.; Fang, Y.; He, Z. Electrochemical Quantitative Detection of Glial Fibrillary Acidic Protein Based on Molecularly Imprinted Polymer Sensor. *INTERNATIONAL JOURNAL OF ELECTROCHEMICAL SCIENCE* **2017**, *12*, 7341–7350.
4. Song, J.; Dailey, J.; Li, H.; Jang, H.-J.; Zhang, P.; Wang, J.T.-H.; Everett, A.D.; Katz, H.E. Extended Solution Gate OFET-Based Biosensor for Label-Free Glial Fibrillary Acidic Protein Detection with Polyethylene Glycol-Containing Bioreceptor Layer. *Advanced Functional Materials* **2017**, *27*, 1606506 1-7.
5. Khetani, S.; Ozhukil Kollath, V.; Kundra, V.; Nguyen, M.D.; Debert, C.; Sen, A.; Karan, K.; Sanati-Nezhad, A. Polyethylenimine Modified Graphene-Oxide Electrochemical Immunosensor for the Detection of Glial Fibrillary Acidic Protein in Central Nervous System Injury. *ACS sensors* **2018**, *3*, 844–851.
6. Ma, Y.; Xu, G.; Wei, F.; Cen, Y.; Song, Y.; Ma, Y.; Xu, X.; Shi, M.; Sohail, M.; Hu, Q. Carbon Dots Based Immunosorbent Assay for the Determination of GFAP in Human Serum. *Nanotechnology* **2018**, *29*, 145501, doi:10.1088/1361-6528/aaabea.
7. Cardinell, B.A.; Addington, C.P.; Stabenfeldt, S.E.; La Belle, J.T. Multi-Biomarker Detection Following Traumatic Brain Injury. *Critical Reviews™ in Biomedical Engineering* **2019**, *47*, 193–206.
8. Agostini, M.; Amato, F.; Vieri, M.L.; Greco, G.; Tonazzini, I.; Baroncelli, L.; Caleo, M.; Vannini, E.; Santi, M.; Signore, G.; et al. Glial-Fibrillary-Acidic-Protein (GFAP) Biomarker Detection in Serum-Matrix: Functionalization Strategies and Detection by an Ultra-High-Frequency Surface-Acoustic-Wave (UHF-SAW) Lab-on-Chip. *Biosensors and Bioelectronics* **2021**, *172*, 112774, doi:10.1016/j.bios.2020.112774.
9. Button, E.B.; Cheng, W.H.; Barron, C.; Cheung, H.; Bashir, A.; Cooper, J.; Gill, J.; Stukas, S.; Baron, D.C.; Robert, J.; et al. Development of a Novel, Sensitive Translational Immunoassay to Detect Plasma Glial Fibrillary Acidic Protein (GFAP) after Murine Traumatic Brain Injury. *Alz Res Therapy* **2021**, *13*, 58, doi:10.1186/s13195-021-00793-9.
10. Krausz, A.D.; Korley, F.K.; Burns, M.A. A Variable Height Microfluidic Device for Multiplexed Immunoassay Analysis of Traumatic Brain Injury Biomarkers. *Biosensors* **2021**, *11*, 320, doi:10.3390/bios11090320.
11. Natarajan, S.; Joseph, J. A Novel Time-Resolved Fluorescent Lateral Flow Immunoassay for Quantitative Detection of the Trauma Brain Injury Biomarker-Glial Fibrillary Acidic Protein. *Sens. Diagn.* **2022**, *1*, 193–197, doi:10.1039/D1SD00021G.
12. GFAP ELISA Kit | Sigma-Aldrich Available online: <http://www.sigmaaldrich.com/> (accessed on 30 August 2021).
13. R-PLEX Human GFAP Antibody Set | Meso Scale Discovery Available online: <https://www.mesoscale.com/en/products/r-plex-human-gfap-antibody-set-f211m/> (accessed on 31 August 2021).
14. [https://www.banyanbio.com/assets/files/000175\\_vA-IFU-Banyan-BTI.pdf](https://www.banyanbio.com/assets/files/000175_vA-IFU-Banyan-BTI.pdf).
15. Bazarian, J.J.; Biberthaler, P.; Welch, R.D.; Lewis, L.M.; Barzo, P.; Bogner-Flatz, V.; Brolinson, P.G.; Büki, A.; Chen, J.Y.; Christenson, R.H.; et al. Serum GFAP and UCH-L1 for Prediction of Absence of Intracranial Injuries on Head CT (ALERT-TBI): A Multicentre Observational Study. *The Lancet Neurology* **2018**, *17*, 782–789.
16. Simoa Technology, <https://www.Quanterix.Com/Technology>, Last Accessed 27.04.2020. *Quanterix* 2019.
17. TBI Plasma Cartridge | Abbott Point of Care Available online: <https://www.pointofcare.abbott/us/en/offerings/istat/istat-test-cartridges/TBI-Plasma> (accessed on 30 August 2021).
18. Okonkwo, D.O.; Puffer, R.C.; Puccio, A.M.; Yuh, E.L.; Yue, J.K.; Diaz-Arrastia, R.; Korley, F.K.; Wang, K.K.W.; Sun, X.; Taylor, S.R.; et al. Point-of-Care Platform Blood Biomarker Testing of Glial Fibrillary Acidic Protein versus S100 Calcium-Binding Protein B for Prediction of Traumatic Brain Injuries: A Transforming Research and Clinical Knowledge in Traumatic Brain Injury Study. *J Neurotrauma* **2020**, *37*, 2460–2467, doi:10.1089/neu.2020.7140.
19. Korley, F.K.; Datwyler, S.A.; Jain, S.; Sun, X.; Beligere, G.; Chandran, R.; Marino, J.A.; McQuiston, B.; Zhang, H.; Caudle, K.L.; et al. Comparison of GFAP and UCH-L1 Measurements from Two Prototype Assays: The Abbott i-STAT and ARCHITECT Assays. *Neurotrauma Rep* **2021**, *2*, 193–199, doi:10.1089/neur.2020.0037.
20. Miller, C.J.; Hu, J. Magnetic Immunosensor and Method of Use 2018.

21. biodirection\_zmuop8 The NanoDx™ System for TBI | Our Solution Available online: <https://nanodiagnosics.com/our-solution/the-nanodx-system-for-tbi/> (accessed on 30 August 2021).
22. Feng, L.-N.; Bian, Z.-P.; Peng, J.; Jiang, F.; Yang, G.-H.; Zhu, Y.-D.; Yang, D.; Jiang, L.-P.; Zhu, J.-J. Ultrasensitive Multianalyte Electrochemical Immunoassay Based on Metal Ion Functionalized Titanium Phosphate Nanospheres. *Anal. Chem.* **2012**, *84*, 7810–7815.
23. Stan, D.; Mihailescu, C.-M.; Iosub, R.; Moldovan, C.; Savin, M.; Baciu, I. Electrochemical Studies of Homogeneous Self-Assembled Monolayers versus Mixed Self-Assembled Monolayers on Gold Electrode for “Label Free” Detection of Heart Fatty Acid Binding Protein. *Thin Solid Films* **2012**, *526*, 143–149.
24. Carless, D.R.; Wnęk, M.; Knox, C.; Harrison, K.R.; Calder, N.; Hall, A.S.; Barth, J.H. Clinical and Analytical Evaluation of an Immunoturbidimetric Heart-Type Fatty Acid-Binding Protein Assay. *Scandinavian Journal of Clinical and Laboratory Investigation* **2013**, *73*, 48–53, doi:10.3109/00365513.2012.734396.
25. Mihailescu, C.-M.; Stan, D.; Iosub, R.; Moldovan, C.; Savin, M. A Sensitive Capacitive Immunosensor for Direct Detection of Human Heart Fatty Acid-Binding Protein (h-FABP). *Talanta* **2015**, *132*, 37–43.
26. Qin, X.; Xu, A.; Liu, L.; Sui, Y.; Li, Y.; Tan, Y.; Chen, C.; Xie, Q. Selective Staining of CdS on ZnO Biolabel for Ultrasensitive Sandwich-Type Amperometric Immunoassay of Human Heart-Type Fatty-Acid-Binding Protein and Immunoglobulin G. *Biosensors and Bioelectronics* **2017**, *91*, 321–327.
27. Qin, X.; Zhang, X.; Wang, M.; Dong, Y.; Liu, J.; Zhu, Z.; Li, M.; Yang, D.; Shao, Y. Fabrication of Tris(Bipyridine)Ruthenium(II)-Functionalized Metal–Organic Framework Thin Films by Electrochemically Assisted Self-Assembly Technique for Electrochemiluminescent Immunoassay. *Anal. Chem.* **2018**, *90*, 11622–11628.
28. Savin, M.; Mihailescu, C.-M.; Matei, I.; Stan, D.; Moldovan, C.A.; Ion, M.; Baciu, I. A Quantum Dot-Based Lateral Flow Immunoassay for the Sensitive Detection of Human Heart Fatty Acid Binding Protein (HFABP) in Human Serum. *Talanta* **2018**, *178*, 910–915, doi:10.1016/j.talanta.2017.10.045.
29. Crapnell, R.D.; Canfarotta, F.; Czulak, J.; Johnson, R.; Betlem, K.; Mecozzi, F.; Down, M.P.; Eersels, K.; van Grinsven, B.; Cleij, T.J.; et al. Thermal Detection of Cardiac Biomarkers Heart-Fatty Acid Binding Protein and ST2 Using a Molecularly Imprinted Nanoparticle-Based Multiplex Sensor Platform. *ACS Sens.* **2019**, *4*, 2838–2845, doi:10.1021/acssensors.9b01666.
30. Li, F.; Guo, L.; Hu, Y.; Li, Z.; Liu, J.; He, J.; Cui, H. Multiplexed Chemiluminescence Determination of Three Acute Myocardial Infarction Biomarkers Based on Microfluidic Paper-Based Immunodevice Dual Amplified by Multifunctionalized Gold Nanoparticles. *Talanta* **2020**, *207*, 120346, doi:10.1016/j.talanta.2019.120346.
31. Gan, X.; Han, D.; Wang, J.; Liu, P.; Li, X.; Zheng, Q.; Yan, Y. A Highly Sensitive Electrochemiluminescence Immunosensor for H-FABP Determination Based on Self-Enhanced Luminophore Coupled with Ultrathin 2D Nickel Metal-Organic Framework Nanosheets. *Biosens Bioelectron* **2021**, *171*, 112735, doi:10.1016/j.bios.2020.112735.
32. TBICheck - The Fastest Diagnostic Test for Traumatic Brain Injury Available online: <https://tbicheck.com/home> (accessed on 30 August 2021).
33. Human H-FABP ELISA Kit (Ab243682) | Abcam Available online: [https://www.abcam.com/Human-H-FABP-ELISA-Kit-ab243682.html?gclid=aw.ds|aw.ds&gclid=Cj0KCQjwg7KJBhDyARIsAHRAXaH7SK6R4I\\_1DbOvLN1pxInqW42hnrT0Nk4Yjew7t-ynxwT-aoeUn4EaAuTJEALw\\_wcB](https://www.abcam.com/Human-H-FABP-ELISA-Kit-ab243682.html?gclid=aw.ds|aw.ds&gclid=Cj0KCQjwg7KJBhDyARIsAHRAXaH7SK6R4I_1DbOvLN1pxInqW42hnrT0Nk4Yjew7t-ynxwT-aoeUn4EaAuTJEALw_wcB) (accessed on 30 August 2021).
34. R-PLEX Human FABP3/H-FABP Antibody Set | Meso Scale Discovery Available online: <https://www.mesoscale.com/en/products/r-plex-human-fabp3-h-fabp-antibody-set-f214t/> (accessed on 31 August 2021).
35. Missler, U.; Wiesmann, M.; Friedrich, C.; Kaps, M. S-100 Protein and Neuron-Specific Enolase Concentrations in Blood as Indicators of Infarction Volume and Prognosis in Acute Ischemic Stroke. *Stroke* **1997**, *28*, 1956–1960, doi:10.1161/01.STR.28.10.1956.
36. PII: S0022-1759(97)00050-1 | Elsevier Enhanced Reader Available online: <https://reader.elsevier.com/reader/sd/pii/S0022175997000501?token=A464853B1ED8E1A9E89C9B8F041BB4E0DF5188385648EF4C35723E513BFC3977CFC76D86BA77D9A85AFD7B71FF48711E&originRegion=e-u-west-1&originCreation=20210827152016> (accessed on 27 August 2021).
37. Leite, M.C.; Galland, F.; Brolese, G.; Guerra, M.C.; Bortolotto, J.W.; Freitas, R.; Almeida, L.M.V. de; Gottfried, C.; Gonçalves, C.-A. A Simple, Sensitive and Widely Applicable ELISA for S100B: Methodological Features of the Measurement of This Glial Protein. *Journal of Neuroscience Methods* **2008**, *169*, 93–99, doi:10.1016/j.jneumeth.2007.11.021.

38. Liu, Y.; Wang, H.; Chen, J.; Liu, C.; Li, W.; Kong, J.; Yang, P.; Liu, B. A Sensitive Microchip-Based Immunosensor for Electrochemical Detection of Low-Level Biomarker S100B. *Electroanalysis* **2013**, *25*, 1050–1055.
39. Wang, X.; Li, H.; Li, X.; Chen, Y.; Yin, Y.; Li, G. Electrochemical Assay of Melanoma Biomarker in Human Blood. *Electrochemistry Communications* **2014**, *39*, 12–14.
40. Mikuła, E.; Wysłouch-Cieszyńska, A.; Zhukova, L.; Puchalska, M.; Verwilt, P.; Dehaen, W.; Radecki, J.; Radecka, H. Voltammetric Detection of S100B Protein Using His-Tagged Receptor Domains for Advanced Glycation End Products (RAGE) Immobilized onto a Gold Electrode Surface. *Sensors* **2014**, *14*, 10650–10663.
41. Kim, C.; Searson, P.C. Magnetic Bead-Quantum Dot Assay for Detection of a Biomarker for Traumatic Brain Injury. *Nanoscale* **2015**, *7*, 17820–17826, doi:10.1039/C5NR05608J.
42. Kurzątkowska, K.; Jankowska, A.; Wysłouch-Cieszyńska, A.; Zhukova, L.; Puchalska, M.; Dehaen, W.; Radecka, H.; Radecki, J. Voltammetric Detection of the S100B Protein Using His-Tagged RAGE Domain Immobilized onto a Gold Electrode Modified with a Dipyrromethene–Cu(II) Complex and Different Diluents. *Journal of Electroanalytical Chemistry* **2016**, *767*, 76–83.
43. Khetani, S.; Aburashed, R.; Singh, A.; Sen, A.; Sanati-Nezhad, A. Immunosensing of S100 $\beta$  Biomarker for Diagnosis of Spinal Cord Injuries (SCI). *Sensors and Actuators B: Chemical* **2017**, *247*, 163–169.
44. Kuo, Y.-C.; Lee, C.-K.; Lin, C.-T. Improving Sensitivity of a Miniaturized Label-Free Electrochemical Biosensor Using Zigzag Electrodes. *Biosensors and Bioelectronics* **2018**, *103*, 130–137.
45. Wang, Y.; Zhao, P.; Mao, L.; Hou, Y.; Li, D. Determination of Brain Injury Biomarkers by Surface-Enhanced Raman Scattering Using Hollow Gold Nanospheres. *RSC Adv.* **2018**, *8*, 3143–3150, doi:10.1039/C7RA12410D.
46. Mathew, A.S.; Shi, X.; Yau, S.-T. Detection of a Traumatic Brain Injury Biomarker at the 10 Fg/ML Level. *Molecular Diagnosis & Therapy* **2018**, *22*, 729–735.
47. Sun, J.; Zhao, Y.; Hou, Y.; Li, H.; Yang, M.; Wang, Y.; Sun, B. Multiplexed Electrochemical and SERS Dual-Mode Detection of Stroke Biomarkers: Rapid Screening with High Sensitivity. *New Journal of Chemistry* **2019**, *43*, 13381–13387.
48. Tabrizi, M.A.; Ferré-Borrull, J.; Kapruwan, P.; Marsal, L.F. A Photoelectrochemical Sandwich Immunoassay for Protein S100 $\beta$ , a Biomarker for Alzheimer's Disease, Using an ITO Electrode Modified with a Reduced Graphene Oxide-Gold Conjugate and CdS-Labeled Secondary Antibody. *Microchimica Acta* **2019**, *186*, 117 1–9.
49. Harpaz, D.; Koh, B.; Marks, R.S.; Seet, R.C.S.; Abdulhalim, I.; Tok, A.I.Y. Point-of-Care Surface Plasmon Resonance Biosensor for Stroke Biomarkers NT-ProBNP and S100 $\beta$  Using a Functionalized Gold Chip with Specific Antibody. *Sensors* **2019**, *19*, 2533, doi:10.3390/s19112533.
50. Han, L.; Ding, C.; Guo, Y.; Wang, Y.; Ding, Y. Sensitively Detecting MTBI Biomarker S100B by Using Peptide-Modified Ratiometric Fluorescent C/AuNCs Nanoprobe. *Anal Bioanal Chem* **2020**, *412*, 3695–3702, doi:10.1007/s00216-020-02613-9.
51. Hassanain, W.A.; Sivanesan, A.; Ayoko, G.A.; Izake, E.L. Rapid Electrochemical Nanosensing of S100 $\beta$  in Blood. *J. Electrochem. Soc.* **2020**, *167*, 067518, doi:10.1149/1945-7111/ab82fb.
52. Gao, X.; Boryczka, J.; Zheng, P.; Kasani, S.; Yang, F.; Engler-Chiurazzi, E.B.; Simpkins, J.W.; Wigginton, J.G.; Wu, N. A “Hot Spot”-Enhanced Paper Lateral Flow Assay for Ultrasensitive Detection of Traumatic Brain Injury Biomarker S-100 $\beta$  in Blood Plasma. *Biosensors and Bioelectronics* **2021**, *177*, 112967, doi:10.1016/j.bios.2021.112967.
53. Elecsys® S100 Available online: <https://diagnostics.roche.com/global/en/products/params/electsys-s100.html> (accessed on 27 August 2021).
54. Delefortrie, Q.; Lejeune, F.; Kerzmann, B.; Levy, R.; Adam, J.-F.; Sottiaux, T.; Grimmelprez, A.; Vankerkhoven, P.; Hachimi-Idrissi, S. Evaluation of the Roche® Elecsys and the Diasorin® Liaison S100 Kits in the Management of Mild Head Injury in the Emergency Room. *Clinical Biochemistry* **2018**, *52*, 123–130, doi:10.1016/j.clinbiochem.2017.11.004.
55. CanAg® S100 EIA | Fujirebio Available online: <https://www.fujirebio.com/en/products-solutions/canag-s100-eia> (accessed on 27 August 2021).
56. Human S100B ELISA, EZHS100B-33K This Human S100B ELISA Kit Is to Be Used for the Quantification of Human S100B in Cerebrospinal Fluid, Serum & Plasma. | Sigma-Aldrich Available online: <http://www.sigmaaldrich.com/> (accessed on 30 August 2021).
57. S100B ELISA Kit (Ab234573) | Abcam Available online: <https://www.abcam.com/s100b-elisa-kit-ab234573.html> (accessed on 30 August 2021).

58. Human S100B ELISA Kit by Bioss, Cat. No. BSKH1066 | Lucerna-Chem AG Available online: <https://lucerna-chem.ch/shop/3438089/human-s100b-elisa-kit> (accessed on 30 August 2021).
59. S100b ELISA Kit (Rabbit) (GWB-KBBVZ1) | Quantitative Sandwich ELISA Available online: <https://www.genwaybio.com/s100b-elisa-kit-rabbit-gwb-kbbvz1> (accessed on 30 August 2021).
60. Pankratova, N.; Jović, M.; Pfeifer, M.E. Electrochemical Sensing of Blood Proteins for Mild Traumatic Brain Injury (MTBI) Diagnostics and Prognostics: Towards a Point-of-Care Application. *RSC Adv.* **2021**, *11*, 17301–17319, doi:10.1039/D1RA00589H.
